# Supplementary material for: A Sensitive and Portable Double-Layer Microfluidic Biochip for Harmful Algae Detection
Source: MDPI journal article supplement (doi:10.3390/mi13101759), 2022-10-18
Supplement: s1 [file s1]

## Supporting information

### **A sensitive and portable double-layer microfluidic biochip for HABs detection**

*Ping Li<sup>1</sup>, Le Qiang<sup>1,2,3</sup>, Yingkuan Han<sup>1</sup>, Yujin Chu<sup>1</sup>, Jiaoyan Qiu<sup>1</sup>, Fangteng Song<sup>1</sup>, Min Wang<sup>1</sup>, Qihang He<sup>1</sup>, Yunhong Zhang<sup>1</sup>, Mingyuan Sun<sup>1</sup>, Caiwen Li<sup>4</sup>, Shuqun Sun<sup>4</sup>, Yun Liu<sup>4</sup>, Lin Han<sup>1</sup>,  
\*and Yu Zhang<sup>1</sup>, \**

<sup>1</sup> Institute of Marine Science and Technology, Shandong University, Qingdao (266000), China

<sup>2</sup> Key Laboratory of Shaanxi Province for Craniofacial Precision Medicine Research, College of Stomatology, Xi'an Jiaotong University

<sup>3</sup> Department of Endodontics, Hospital of Stomatology, Xi'an Jiaotong University, Xi'an, China

<sup>4</sup> CAS Key Laboratory of Marine Ecology and Environmental Sciences, Institute of Oceanology, Chinese Academy of Sciences, Qingdao 266071, China

\* Correspondence: yuzhang@sdu.edu.cn (Yu Zhang), hanlin@sdu.edu.cn (Lin Han)

Ping Li and Le Qiang contributed equally

## Content:

|                                                                                  |    |
|----------------------------------------------------------------------------------|----|
| Table S1. Distribution of the six HABs in this paper in Chinese waters .....     | 3  |
| Table S2. Frequency of red tide organisms in China's offshore waters .....       | 3  |
| Figure S1. Layout of double-layer microfluidic biochips.....                     | 4  |
| Figure S2. Fabrication process of double-layer microfluidic biochips.....        | 5  |
| Figure S3. Masks of double-layer microfluidic biochips.....                      | 6  |
| Figure S4. The double-layer microfluidic biochips .....                          | 6  |
| Figure S5. Characterization of graphene oxide.....                               | 7  |
| Table S3. The probe sequence used in the experiment .....                        | 8  |
| Table S4. The concentration of harmful algae in mixed samples .....              | 9  |
| Table S5. Biosensor detection linear equation of six HABs 18S rDNA gene .....    | 10 |
| Table S6. Cells concentration corresponding to 18S rDNA gene concentration ..... | 11 |

**Table S1.** Distribution of the six HABs in this paper in Chinese waters <sup>[1]</sup>

| Alage                               | Toxicity | Alarm Value<br>10 <sup>4</sup> cells L <sup>-1</sup> | Distribution in China |          |           |
|-------------------------------------|----------|------------------------------------------------------|-----------------------|----------|-----------|
|                                     |          |                                                      | Yellow Sea            | East Sea | South Sea |
| <i>Heterosigma akashiwo</i>         | *        | 500                                                  | +                     |          |           |
| <i>Alexandrium catenella</i>        | PSP      | 50                                                   | +                     | +        | +         |
| <i>Amphidinium carterae</i> Hulburt | *        | 100                                                  |                       |          | +         |
| <i>Karenia mikimotoi</i>            | *        | 100                                                  |                       | +        | +         |
| <i>Prorocentrum lima</i>            | DSP      | 50                                                   |                       | +        | +         |
| <i>Skeletonema costatum</i>         |          | 1000                                                 | +                     | +        | +         |

**Note:** \*: Toxin production

+: Distributed throughout the region

PSP: Paralytic shellfish poisoning

DSP: Diarrhetic shellfish poison

**Table S2.** Frequency of red tide organisms in China's offshore waters <sup>[2]</sup>

| Alage              | Year Statistics |      |      |      |      |      |      |      |      |      |
|--------------------|-----------------|------|------|------|------|------|------|------|------|------|
|                    | 2008            | 2009 | 2010 | 2011 | 2012 | 2013 | 2014 | 2015 | 2016 | 2017 |
| <i>H.akashiwo</i>  | 2               | 4    | 2    | 2    |      | 1    | 3    | 2    | 4    | 1    |
| <i>A.catenella</i> |                 |      |      |      |      |      |      |      | 2    |      |
| <i>K.mikimotoi</i> |                 | 1    |      |      |      |      |      |      |      |      |
| <i>A.carterae</i>  | 3               | 7    | 4    |      | 19   | 2    | 4    | 3    | 1    | 12   |
| <i>P.lima</i>      |                 |      | 1    |      |      |      |      |      |      |      |
| <i>S.costatum</i>  | 10              | 8    | 6    | 7    | 9    | 6    | 2    | 8    | 8    | 4    |

### Design of double-layer microfluidic biochip.

The design of the double-layer microfluidic biochip structure is shown in **Figure S1**. The red part represented the upper layer chip for sample adding, the green part expressed the bottom sensor chip structure, and the yellow part was the two-layer shared structure. Double-layer microfluidic biochip contained 12 detection units, each of which was composed of the sample adding part in the upper chip and the sensing part in the bottom. Through the three divided microfluidic channels of the upper chip, GO nanomaterial solution, specific ssDNA probe with fluorescent group, and sample to be tested could be added separately, and then the mixed liquid could be used for nucleic acid hybridization reaction and subsequent detection in the sensing chamber of the bottom chip. In addition, there were micro-channels in the bottom chip to collect the waste liquid of each unit. To achieve the alignment of the upper and lower layers during chip bonding, the micro-channels in the upper chip were designed to penetrate deeply into the space of sensing chamber in the bottom chip.

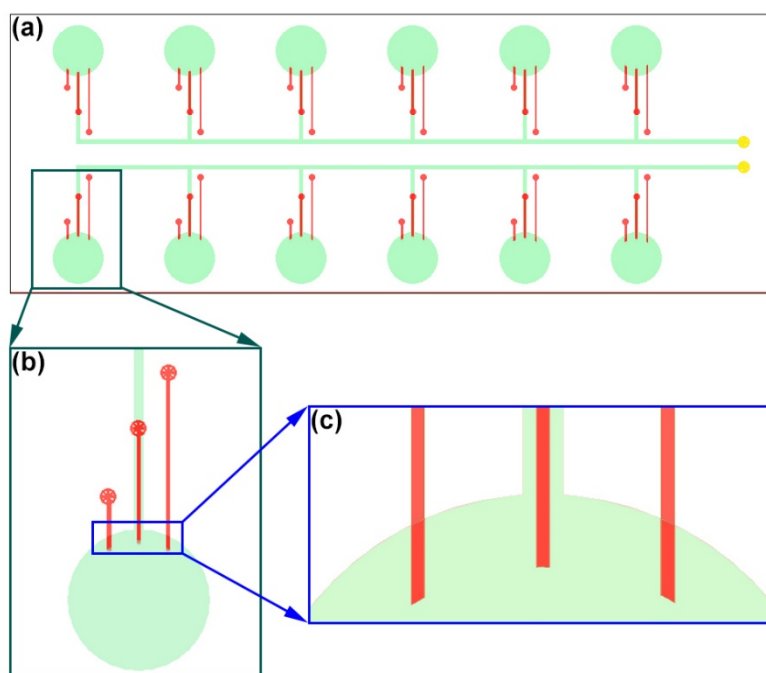

**Figure S1.** Layout of double-layer microfluidic biochips

(a) General layout of biochip; (b) Layout of every unit; (c) Alignment of double-layer

## Manufacturing process of double-layer microfluidic biochip

Figure S2 demonstrates the complete chip fabrication process.

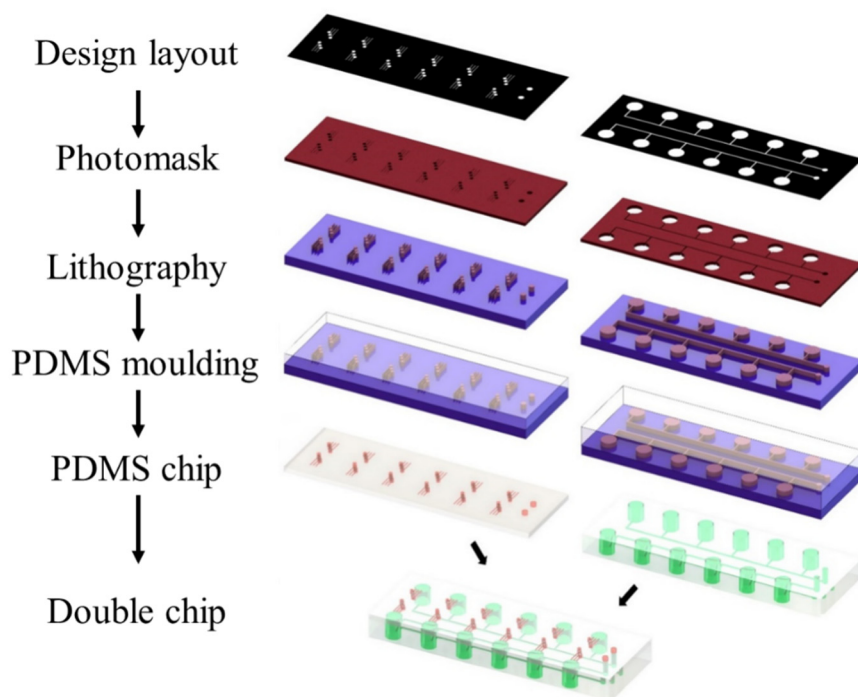

**Figure S2.** Fabrication process and production of double-layer microfluidic biochips

First of all, the design drawing was made into a film mask strictly in accordance with the design parameters (**Figure S3**). Ultraviolet rays could pass through the transparent part of the mask during photolithography, so that the photoresist under the mask was exposed. This double-layer microfluidic biological chip, with the size of glass slide ( $7.5\text{ cm} \times 2.5\text{ cm}$ ), integrated sample adding, reaction and detection. It was compact and light, which was convenient to carry when going to sea.

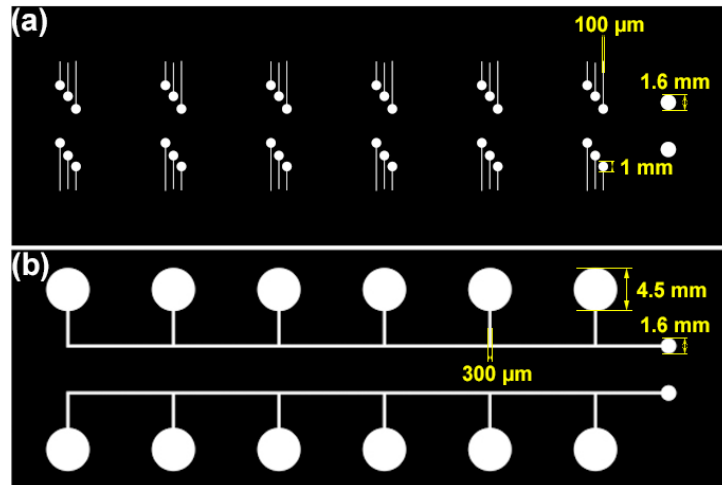

**Figure S3.** Masks of double-layer microfluidic biochips (a) Upper layer; (b) Bottom layer

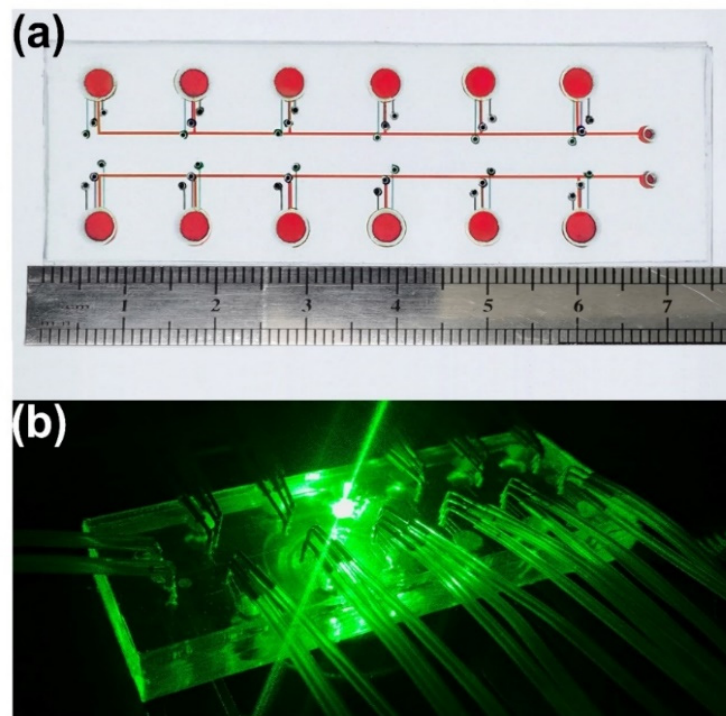

**Figure S4.** The double-layer microfluidic biochips

(a) Top view (colors are marked with ink); (b) Test view

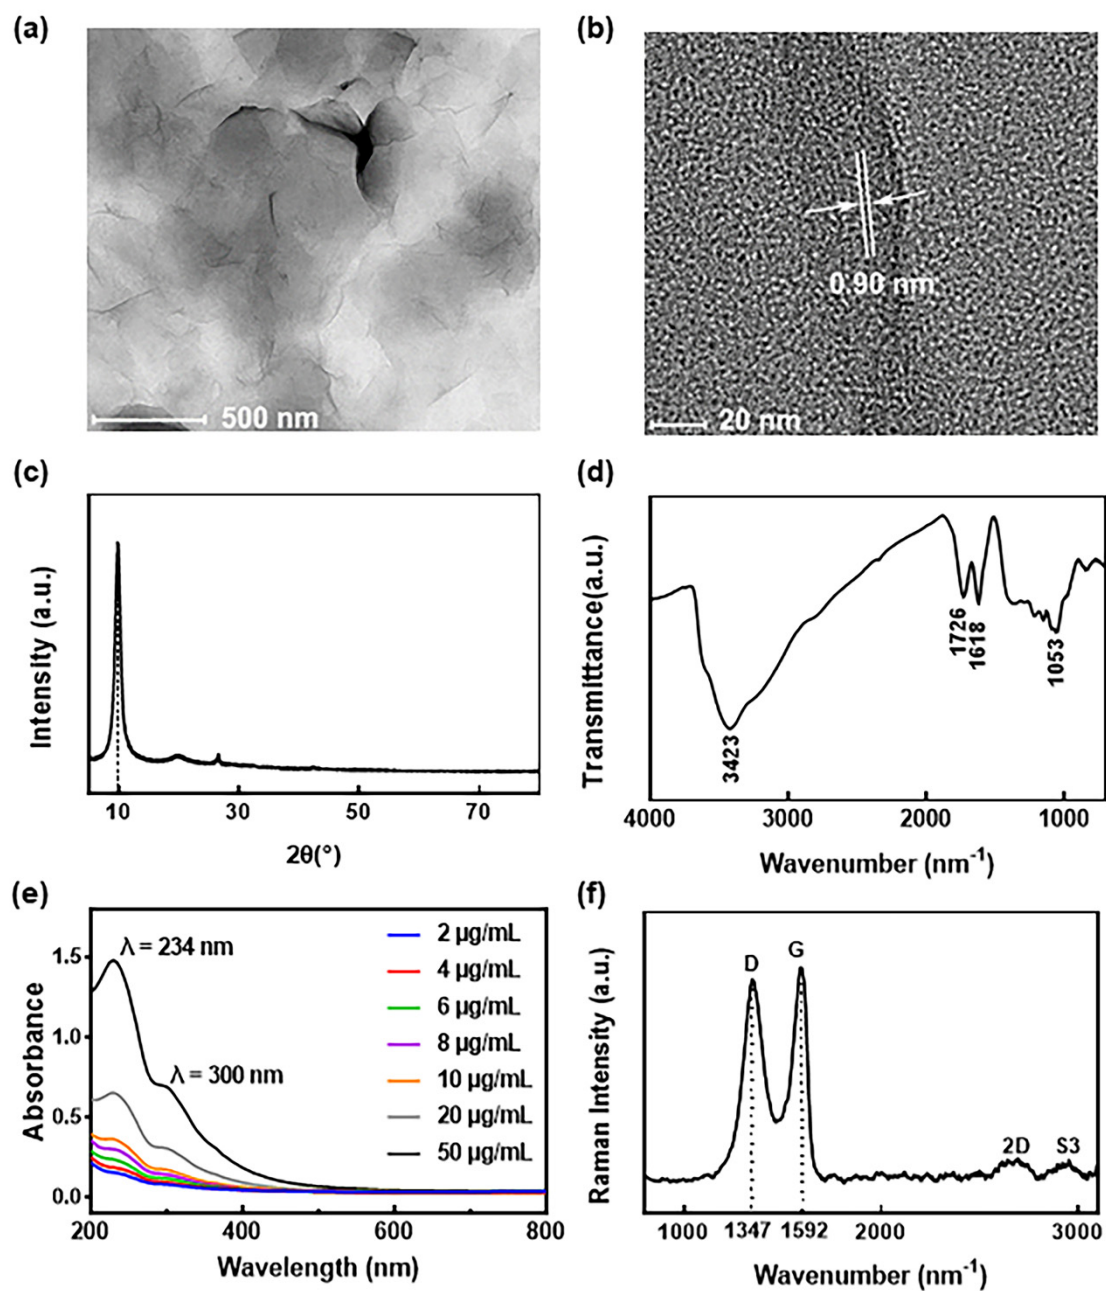

**Figure S5.** Characterization of graphene oxide (a) TEM image of 500 nm; (b) TEM image of 20 nm; (c) XRD pattern of GO; (d) FTIR spectra of GO; (e) UV-visible absorption spectra of GO at different concentrations; (f) Raman spectra of GO

The probe sequences and part of 18S rDNA sequences of algae used in the experiment are listed in Table S3.

**Table S3. The probe sequence used in the experiment**

|                   | Name               | Sequence (5'→3')                             | bp |
|-------------------|--------------------|----------------------------------------------|----|
| <b>Probe DNA</b>  | <i>H.akashiwo</i>  | AACTGCTTCGGCGGACGGGATGTATTTATTAGATGGAAAC-Cy3 | 40 |
|                   | <i>A.catenella</i> | CTTCCGTCAATTCCTTTAAGTTTCAGCCTTGCGACCATAC-Cy3 | 40 |
|                   | <i>K.mikimotoi</i> | TGGCGAATGAACAGGGATAAGCTCAGCATGGAAATTGGGG-Cy3 | 40 |
|                   | <i>A.carterae</i>  | GAAGGTATCAGTGTAGCGCGCGTGCAGCCCAGAACATCTA-Cy3 | 40 |
|                   | <i>P.lima</i>      | GTCGCAAGGCTGAAACTTAAAGGAATTGACGGAAGGGCAC-Cy3 | 40 |
|                   | <i>S.costatum</i>  | CGTCAATTTCTTTAAGTTTCAGCCTTGCGACCATACTCCC-Cy3 | 40 |
| <b>Target DNA</b> | <i>H.akashiwo</i>  | GTTTCCATCTAATAAATACATCCCGTCCGCCGAAGCAGTT     | 40 |
|                   | <i>A.catenella</i> | GTATGGTCGCAAGGCTGAAACTTAAAGGAATTGACGGAAG     | 40 |
|                   | <i>K.mikimotoi</i> | CCCCAATTTCCATGCTGAGCTTATCCCTGTTTCATTTCGCCA   | 40 |
|                   | <i>A.carterae</i>  | TAGATGTTCTGGGCTGCACGCGCGCTACACTGATACCTTC     | 40 |
|                   | <i>P.lima</i>      | GTGCCCTTCCGTCAATTCCTTTAAGTTTCAGCCTTGCGAC     | 40 |
|                   | <i>S.costatum</i>  | GGGAGTATGGTCGCAAGGCTGAAACTTAAAGAAATTGACG     | 40 |



**Table S4.** The concentration of harmful algae in mixed samples

| Number   | Algal cell concentration (cells/mL) |                       |                    |                   |                       |                    |
|----------|-------------------------------------|-----------------------|--------------------|-------------------|-----------------------|--------------------|
|          | <i>H.akashiwo</i>                   | <i>A.catenella</i>    | <i>K.mikimotoi</i> | <i>A.carterae</i> | <i>P.lima</i>         | <i>S.costatum</i>  |
| <b>1</b> | $2.5 \times 10^5$                   | $1.01 \times 10^{-1}$ | $9 \times 10^{-1}$ | $1.5 \times 10^3$ | $1.22 \times 10^2$    | $6.05 \times 10^4$ |
| <b>2</b> | $2.5 \times 10^4$                   | $1.01 \times 10^4$    | $9 \times 10^{-2}$ | $1.5 \times 10^2$ | $1.22 \times 10^1$    | $6.05 \times 10^3$ |
| <b>3</b> | $2.5 \times 10^3$                   | $1.01 \times 10^3$    | $9 \times 10^3$    | $1.5 \times 10^1$ | $1.22 \times 10^0$    | $6.05 \times 10^2$ |
| <b>4</b> | $2.5 \times 10^2$                   | $1.01 \times 10^2$    | $9 \times 10^2$    | $1.5 \times 10^6$ | $1.22 \times 10^{-1}$ | $6.05 \times 10^1$ |
| <b>5</b> | $2.5 \times 10^1$                   | $1.01 \times 10^1$    | $9 \times 10^1$    | $1.5 \times 10^5$ | $1.22 \times 10^4$    | $6.05 \times 10^0$ |
| <b>6</b> | $2.5 \times 10^0$                   | $1.01 \times 10^0$    | $9 \times 10^0$    | $1.5 \times 10^4$ | $1.22 \times 10^3$    | $6.05 \times 10^5$ |

**Table S5.** Detection range, standard curves, and LOD of six HABs 18S rDNA gene

| Name               | Linear fitting equation  | Linear range (pM)  | Linear fitting equation of LOD | LOD (aM) | Amplified 18S mass (g/mol) | LOD (ng/mL)           |
|--------------------|--------------------------|--------------------|--------------------------------|----------|----------------------------|-----------------------|
| <i>H.akashiwo</i>  | $Y = 0.9462*(LgX)+5.952$ | $10^{-4}$ - $10^5$ | $Y=187.2559X+2.690$            | 108      | 12316                      | $1.33 \times 10^{-6}$ |
| <i>A.catenella</i> | $Y = 0.9524*(LgX)+4.319$ | $10^{-3}$ - $10^5$ | $Y=99.3892X+1.972$             | 203      | 12623                      | $2.56 \times 10^{-6}$ |
| <i>K.mikimotoi</i> | $Y = 0.8587*(LgX)+4.901$ | $10^{-4}$ - $10^5$ | $Y=61.3841X+1.870$             | 328      | 12210                      | $4.00 \times 10^{-6}$ |
| <i>A.carterae</i>  | $Y = 0.8049*(LgX)+5.068$ | $10^{-4}$ - $10^5$ | $Y=96.7685X+2.098$             | 208      | 12380                      | $2.58 \times 10^{-6}$ |
| <i>P.lima</i>      | $Y = 1.082*(LgX)+5.798$  | $10^{-4}$ - $10^5$ | $Y=165.6022X+3.188$            | 122      | 12281                      | $1.50 \times 10^{-6}$ |
| <i>S.costatum</i>  | $Y = 1.173*(LgX)+5.663$  | $10^{-3}$ - $10^5$ | $Y=109.0690X+1.823$            | 185      | 12623                      | $2.34 \times 10^{-6}$ |

$LOD = 3 \times \delta/S$  where  $\delta$  is the standard deviation of the blank and S is the gradient of the linear regression equation, the average background = 1063.41733(a.u),  $\delta = 0.00672$ .

Molecular weight of DNA =  $(A_n \times 313.2) + (T_n \times 304.2) + (C_n \times 289.2) + (G_n \times 329.2) + 79.0$ , where  $A_n$ ,  $T_n$ ,  $C_n$  and  $G_n$  represent the number of A, T, C and G nucleobase respectively, meanwhile, the increase of 79 is due to consideration of the mass of 5'-end monophosphate.

Take *H.a kashiwo* as an example:

$$LOD = 3 \times \delta/S = 3 \times 0.00672/187.2559 = 108 \text{ (aM)}$$

The amplified 18S rDNA strand length is 40, the numbers of A, T, C, and G nucleobase are 11, 11, 12 and 6 respectively.

$$\text{Amplified 18S mass} = (11 \times 313.2) + (11 \times 304.2) + (12 \times 289.2) + (6 \times 329.2) + 79.0 = 12316 \text{ (g/mol)}$$

$$LOD = 108 \text{ (aM)} \times 12316 \text{ (g/mol)} = 1.33 \times 10^{-6} \text{ (ng/mL)}$$

**Table S6.** Cells concentration of six HABs corresponding to 18S rDNA gene concentration

| 18S rDNA           | Algal cell concentration (cells/mL) | 18S rDNA concentration (µg/mL) | 18S rDNA length (bp) | 18S rDNA molecular mass (g/mol) | 18S rDNA of per cell (pmol/cells) | cell concentration of 1 pM 18S rDNA (cells/mL) |
|--------------------|-------------------------------------|--------------------------------|----------------------|---------------------------------|-----------------------------------|------------------------------------------------|
| <i>H.akashiwo</i>  | $2.50 \times 10^5$                  | 3.69                           | 1695                 | 1029701                         | $1.432 \times 10^{-5}$            | 69.798                                         |
| <i>A.catenella</i> | $1.01 \times 10^4$                  | 0.61                           | 2111                 | 1282379.4                       | $4.679 \times 10^{-5}$            | 21.373                                         |
| <i>K.mikimotoi</i> | $9.00 \times 10^3$                  | 0.72                           | 1423                 | 864488.2                        | $9.254 \times 10^{-5}$            | 10.806                                         |
| <i>A.carterae</i>  | $1.50 \times 10^6$                  | 4.04                           | 2080                 | 1263550                         | $2.134 \times 10^{-6}$            | 468.676                                        |
| <i>P.lima</i>      | $1.22 \times 10^4$                  | 1.65                           | 1910                 | 1160292                         | $1.167 \times 10^{-4}$            | 8.566                                          |
| <i>S.costatum</i>  | $6.05 \times 10^5$                  | 2.83                           | 1781                 | 1081937.4                       | $4.316 \times 10^{-6}$            | 231.644                                        |

The Qubit™ 3.0 fluorimeter was used to measure the concentrations of 18S rDNA extracted from six kinds of algae cells with known concentrations, and the DNA concentrations were converted to the algae cell concentrations.

## Reference

- [1] HY/T 069-2005; State Oceanic Administration (SOA). Technical Specification for Red Tide Monitoring in China. China National Standardization Management Committee: Beijing, China, 2005.
- [2] Zhang SF, Wang Q, Guan CY, Shen XX, Li RL. Study on the Occurrence Law of Red Tide and Its Influencing Factors in the Offshore Waters of China from 2001 to 2017 [J]. Journal of Peking University (Natural Science Edition), 2020, 56(06): 1129-1140.
